# Supplementary material for: Computational Analysis of Transcriptional Circuitries in Human Embryonic Stem Cells Reveals Multiple and Independent Networks
Source: Biomed Res Int. 2014 Jan 9;2014:725780. doi: 10.1155/2014/725780 (PMC3910540; doi:10.1155/2014/725780)
Supplement: Supplementary file 1 — Supplementary Tables Table S1: 353 genes that are co-occupied by NANOG, OCT4 and SOX2 in human ES cells. Table S2: 145 genes encoding the TFs that target the core target genes. Table S3: 41 overlapping TFs between the 189 TFs set and the 145 TFs set. Table S4: A summary of the top 5 networks based on the combined gene set which is made up of the 353 core-bound genes and the 145 computationally predicted human ES cell related TF genes. Table S5: MYC target genes in human ES cells. Table S6: Human orthologs of the genes in the core module and the genes in the MYC-centered module in ES cells. Table S7: Top 5 pathways associated with the core module and the MYC module respectively. Supplementary Figures Figure S1: Important biological functions related to the 145 computationally predicted human ES cell related TF genes. Figure S2: Important pathways related to the 145 computationally predicted human ES cell related TF genes. Ratio: the ratio of the number of overlapping genes between two gene sets relative to the number of the genes included in the pathway. Figure S3: The network related to the combined gene set with the second highest score is core TFs centered. The combined gene set is made up of the 353 core-bound genes and the 145 computationally predicted human ES cell related TF genes. The core TFs are highlighted in red color. Figure S4: The network related to the combined gene set with the third highest score is TP53-centered. The combined gene set is made up of the 353 core-bound genes and the 145 computationally predicted human ES cell related TF genes. Figure S5: The network related to the MYC target genes with the highest score is MYC-centered. Figure S6: The network related to the MYC target genes with the second highest score is TP53-centered. Figure S7: Top network related to the core module. The three core TFs (in red) form hub nodes in the network. Figure S8: Top network related to the MYC module is MYC-centered. [file 725780.f1.xlsx]

## Sheet: Table S1
Genes co-bound By OCT4, SOX2, and NANOG (from Table S5 of Supplemental Data for Boyer et al.)
Gene
AASDH
ACCN4
ADAMTS16
ADAMTSL1
ADD3
ADRA1A
ANKRD1
ANKRD15
APOBEC3G
ARID1B
ARSD
ATAD2
ATBF1
ATP6V1G1
B3GALT4
BAMBI
BC020923
BC026345
BC061909
BC069363
BDH
BHLHB5
BMP7
BUB1B
BUB3
C12orf2
C13orf7
C15orf29
C6orf111
C7orf16
C7orf33
C9orf74
CA2
CA4
CABLES1
CACNA2D1
CAPZA2
CCL2
CD82
CD99L2
CDC14B
CDC7
CDW92
CDYL
CEI
CHRNA1
COL12A1
COMMD3
COMMD7
CPS1
CPT1A
CSAD
CSMD3
CTGF
DACH1
DBCCR1L
DEPDC2
DHDDS
DHRS3
DKFZp667B0210
DKK1
DLX1
DLX4
DLX5
DMRT1
DPPA4
DPYSL2
DPYSL3
DTNA
DUSP12
DUSP6
EDD
EN1
ENPP2
ENST00000246083
ENST00000291982
ENST00000296508
ENST00000298406
ENST00000308142
ENST00000309467
ENST00000319884
ENST00000331014
ENST00000333380
ENST00000334440
EOMES
EPHA1
EPHA4
ESX1L
EXOSC9
FAM33A
FBXW11
FERD3L
FEZ1
FGF1
FGF2
FGFR1
FGFR2
FIBL-6
FLI1
FLJ10374
FLJ10652
FLJ10769
FLJ11029
FLJ14816
FLJ14936
FLJ20097
FLJ23263
FLJ25369
FLJ25791
FLJ32447
FLJ33167
FLJ35409
FLJ39779
FLJ43582
FLJ45187
FLJ46347
FOXA2
FOXB1
FOXD3
FOXO1A
FRAT2
FTLL1
FUS
FZD10
GAD2
GALNT3
GALNT8
GBX2
GCNT2
GJA1
GLI3
GNG10
GOLGA6
GRAP2
GSC
GSH-2
GTPBP3
H2AFJ
HAND1
HAND2
HAS2
HBG1
HBG2
HESX1
HHEX
HIST1H1B
HIST1H1D
HIST1H2AM
HIST1H2BE
HIST1H2BF
HIST1H2BO
HIST1H3D
HIST1H3I
HIST1H3J
HIST1H4E
HIST1H4F
HIST1H4L
HIST2H4
HIST4H4
HMG20A
HN1
HOP
HOXB1
HOXB3
HOXC4
HSC20
hSyn
ICMT
IER5L
IFI16
IFIH1
IL2RG
INHA
INSM1
IPF1
IRX2
ISL1
JARID2
JMJD1A
JUP
KCNN2
KDR
KIAA1143
KIAA1623
KIAA1919
KIF15
KITLG
KLF5
KLHL5
LAMA4
LARGE
LBP
LBX1
LEFTY2
LGI1
LHPP
LHX2
LHX5
LOC124491
LOC153364
LOC169355
LOC283337
LOC349136
LOC440590
LRAT
LRFN3
LRRC2
LRRN1
LRRN6A
LRRTM3
LY96
MAB21L1
MAN2C1
ME3
MED12
MEIS1
MGC14798
MGC34830
MGC39545
MGC40168
MGC4170
MGEA5
MLLT10
MSC
MTM1
MYF5
MYST3
NAALAD2
NANOG
NEBL
NEUROG1
NFE2L3
NFIA
NFIX
NID67
NKX2-2
NKX2-3
NPAS3
NR2E1
NR4A2
NR6A1
NS3TP2
NUCKS
OLFML2A
OLFML3
OLIG3
ONECUT1
OR5AR1
ORC1L
OSR2
OTP
OTX1
PARG
PAX6
PCGF4
PCTK2
PDCL
PDE10A
PFTK1
PHF17
PHF8
PIPOX
POLR3G
POU5F1
PPAP2A
PPP2R1B
PPP2R3A
PRAC
PRDM14
PRKCDBP
PROX1
PTF1A
PTHLH
PTPN2
RAB5A
RAD54B
RASGRF2
RBM22
REST
RHD
RIF1
RNF127
RNF24
ROR1
RORB
RPS18
RPS3A
SALL1
SEMA3A
SESN3
SET
SFRP1
SFRP2
SFRS4
SHC3
ShrmL
SKIL
SLC24A2
SLC24A3
SLC30A1
SMARCAD1
SNRPN
SOX2
SOX5
SPAG6
SPAG9
SPIC
SPRED1
ST6GAL2
STAT3
STEAP2
SULF1
SYNPR
TAF12
TAL1
TALDO1
TBL1XR1
TBX5
TCF20
TCF7L1
TDGF1
TFAP2C
TFCP2L3
THBS2
TIF1
TIMM23
TITF1
TLE3
TMEM23
TNC
TNRC6A
TOP2A
TRIM22
TRIM5
TSC22D1
UBE2D3
Ufm1
UNQ1940
USP44
USP7
VPS52
WDR36
WDR49
XCL1
YAF2
ZFHX1B
ZFP36L1
ZIC1
ZIC2
ZIC3
ZIC4
ZIC5
ZNF312

## Sheet: Table S2
Genes encoding the TFs that target the core target genes
Gene
ACTR1A
AHR
ALX1
ANGPTL1
APOBEC2
ARID5B
ARNT
ATF6
BACH1
BACH2
BPTF
CDC5L
CEBPA
CEBPB
CNTN2
CPEB1
CR1
CREB1
CUX1
DDIT3
EBF1
EGR2
EGR3
EGR4
EN1
EREG
ESR1
FOXA2
FOXC1
FOXD1
FOXD3
FOXF2
FOXI1
FOXJ2
FOXL1
FOXO1
FOXO3
FOXO4
FOXQ1
GATA1
GATA2
GATA3
GATA6
GCLC
GFI1
GTF3A
HAND1
HBA2
HENMT1
HLF
HMX1
HNF1A
HNF4A
HOXA3
HOXA9
HSF1
HSF2
HTT
IKZF1
IL10
IRF1
IRF2
IRF7
JUN
KCNN4
LHX3
LMO2
MAFG
MAX
MDM2
MECOM
MEF2A
MEIS1
MSX1
MYB
MYC
MYCN
MYOD1
MZF1
NF1
NFE2
NFE2L1
NFIL3
NFKB1
NHLH1
NKX3-1
NONO
NR2F2
NR3C1
NR6A1
OR5I1
PATZ1
PAX2
PAX3
PAX4
PAX5
PAX6
PBX1
PITX2
PLAU
PLXNA2
POU2F1
POU3F2
POU6F1
PPARA
PPARG
PSMC5
RAB11FIP3
REPIN1
REST
RFX1
RPS8
RREB1
RUNX1
SLC22A1
SOAT1
SOX5
SOX9
SP1
SPZ1
SREBF1
SRF
SRY
STAT1
STAT3
STAT5A
STAT5B
TAL1
TBP
TCF3
TCF4
TGIF1
TLX2
TP53
TRAF4
TST1
VSX2
XBP1
YY1
ZBTB6
ZEB1
ZIC1
ZIC3
ZNF238
ZNF513

## Sheet: Table S3
Overlapping TFs between the 189 TFs set and the 145 TFs set
Gene
SRY
POU3F2
FOXD3
SRF
FOXO1
GATA6
STAT1
PAX6
PAX2
GATA1
TAL1
MEIS1
STAT3
MYB
ZIC1
MYC
PAX5
SPZ1
PAX3
RFX1
GATA3
HAND1
GATA2
ZIC3
NFKB1
HOXA9
JUN
TCF4
CUX1
EBF1
TLX2
MYCN
NFE2L1
POU2F1
REST
HNF1A
TCF3
ZEB1
TGIF1
TP53
ARID5B

## Sheet: Table S4
A summary of the top 5 networks based on the combined gene set (Ingenuity® Systems, www.ingenuity.com).
ID	Molecules in Network	Score	Focus Molecules	Top Functions
1	ACTR1A,ARNT,ATPBD4,BMP7,CAPZA2,CCDC94,CEBPA,CPS1,DHDDS,FEZF2,FOXA2,GTPBP3,HNF1A,HNF4A,Igh (family),KATNBL1,KIF15,ME3,MED12,mediator,MYCN,ONECUT1,POLR3G,Ribosomal 40s subunit,RPS8,RPS18,RPS3A,SHP,SKIL,SLC44A1,TLE3,TTI2,UFM1,ZBTB6,ZEB2	51	31	Endocrine System Disorders, Gastrointestinal Disease, Hereditary Disorder
2	Alp,CCL2,chemokine,DLX1,DLX5,DLX6,EBF1,EBF1-FOXO1-TCF3,ESX1,FOXD1,GAD2,GBX2,GLI3,GOLGA6C (includes others),GSC,GSX2,HAND2,HLA-DR,IER5L,IFI16,LBX1,LHX2,LHX5,MSX1,NANOG,NEUROG1,OSR2,OTP,SALL1,SOX2,SOX2-OCT4-NANOG,XCL1,ZIC1,ZIC2,ZIC3	47	30	Embryonic Development, Nervous System Development and Function, Organ Development
3	ADD3,ANKRD1,APOBEC2,Arf,ATAD2,BACH1,BACH2,BPTF,CABLES1,CACNA2D1,Cyclin B,DDIT3,EN1,ENPP2,estrogen receptor,Hd-neuronal intranuclear inclusions,ICMT,KAT6A,KITLG,LAMA4,LARGE,MAFG,NFE2L3,NFIA,NFIX,NR6A1,Nuclear factor 1,OTX1,PATZ1,RAD54B,SHROOM3,THBS2,TP53,TRIM22,ZFP36L1	45	30	Nervous System Development and Function, Tissue Morphology, Embryonic Development
4	Ap2 alpha,C/ebp,CA4,Cebp,CHRNA1,CNTN2,EGR2,EGR4,FEZ1,FOXC1,HOXA3,HOXB1,HOXB3,HOXC4,HTT,ISL1,LHX3,MAB21L1,MHC Class II (complex),OLFML3,PAX2,PAX5,PAX6,PBX1,PDE10A,PITX2,POU2F1,PRKCDBP,SFRP2,SRSF4,STAT1/3/5/6,STAT3/5,STAT5B,thymidine kinase,VSX2	42	28	Embryonic Development, Organismal Development, Cellular Development
5	EGR3,EOMES,ETS,Fetal Hemoglobin,FLI1,FZD10,GATA1,GATA2,GATA3,GATA6,Gata,GNRH,Gpcr,HBA1/HBA2,HBG1,HBG2,hemoglobin,HLF,LMO2,MEIS1,NFE2,NFIL3,NHLH1,NKX3-1,NR2F2,POU3F2,REPIN1,RORB,RUNX1,Smad2/3,TAL1,Tenascin,TFAP2C,TLX2,TNC	42	27	Gene Expression, Cellular Development, Embryonic Development

## Sheet: Table S5
MYC target genes in human ES cells (Ji, Wu et al. 2011)
Gene
ABCB10
ABCC4
ABCE1
ABHD12
ACAA1
ACADVL
ACBD5
ACYP1
ADAT2
AKT3
ALKBH8
ANAPC1
ANKMY2
ANKS1A
ANXA2
APEX1
APOM
ARHGAP9
ARID4A
ARRDC3
B3GALT4
BACH1
BAT1
BMP2
BMP4
BMPR2
BRP44L
BYSL
C10orf118
C10orf2
C11orf82
C12orf24
C14orf156
C19orf39
C22orf13
C2CD2L
C6orf150
CALN1
CAPS
CCDC47
CCDC77
CCDC86
CCDC94
CCL26
CCNJ
CCT3
CD3EAP
CD55
CDC25A
CDCA7L
CEBPZ
CECR5
CENPV
CGA
CHST10
CISD1
CITED2
CLDN10
CLK1
CLK4
CNBP
COG8
COL5A3
CPVL
CPXM1
CR1
CTTN
CYCS
CYFIP1
CYP27B1
DBN1
DCAF13
DDX20
DDX21
DDX42
DDX43
DHX15
DHX33
DHX9
DIRC2
DKC1
DKKL1
DLGAP5
DLX5
DPYSL3
DTL
DUSP13
DVL2
DYDC2
E2F8
ECE2
EDEM3
EDNRA
EIF3B
EIF5A2
EPB41L4B
EPS15
ERH
ESPNL
ESYT2
FAM162A
FAM60A
FASTKD2
FBL
FBXO15
FBXO8
FEN1
FGFBP3
FOSL2
FOXA3
FOXP3
FOXRED2
FUS
FXYD6
G3BP1
GALNT6
GAR1
GART
GDAP2
GEMIN4
GINS1
GLI1
GNG12
GNL3
GOLGA4
GPATCH4
GRHL2
GRWD1
GTF3C4
HEBP1
HELLS
HEY2
HIST1H2AI
HIST1H2BE
HIST1H2BK
HIST1H4D
HIVEP1
HMGN3
HNRNPD
HNRPDL
HSP90AB1
HSPA8
IGSF3
IL23A
ILF3
INO80D
IRF2BP2
IVNS1ABP
JAG1
JAM2
JPH1
KAZALD1
KIAA0182
KIAA1407
KLHL3
KPNB1
KPTN
KRT35
LAPTM4B
LARS
LIN28A
LIPT1
LMNA
LRAT
LRFN5
LRRC2
LRRC3B
LUC7L3
MAD2L2
MANBA
MAT2A
MCM10
MCM3
MCM6
MCM7
MDN1
METTL1
METTL13
METTL2B
METTL8
MID1IP1
MKI67IP
MLLT10
MRPL3
MRPS9
MRTO4
MTERF
MTFP1
MXD1
MYBBP1A
NAT10
NCL
NCOA7
NDUFAF2
NDUFAF4
NDUFB10
NHP2L1
NMNAT2
NOB1
NOL11
NOL6
NOL8
NOLC1
NOP16
NOP58
NOS1AP
NPM1
NPR1
NUDC
NUDT10
NUS1
NUTM1
OBFC2A
OTX2
PAICS
PAK1IP1
PARN
PDF
PELP1
PES1
PFAS
PGK1
PGM2
PHB
PHF14
PHF17
PIF1
PIK3R3
PINX1
PLEKHF2
PMAIP1
POLE3
POLH
POLR1B
POLR3K
PPAT
PPFIBP1
PPP1R13L
PPRC1
PRDM10
PRIMA1
PROK2
PRPS1
PRR22
PSD3
PTMA
PVRL1
RAB17
RANBP1
RBBP4
RBM12
RBM13
RBM15
RBM16
RCBTB2
RDH8
RFX3
RGS16
RHOC
RIOK2
RNASEK
RPRD1B
RRM2
RRP12
RRS1
RSL1D1
RUVBL1
S100A11
SAMD8
SAP30L
SCARB1
SCLY
SCYL2
SDAD1
SDC1
SDCBP2
SEPHS1
SERBP1
SET
SFRP2
SH3BP4
SLC11A2
SLC19A2
SLC1A3
SLC1A5
SLC38A1
SLC38A5
SLCO5A1
SMARCC1
SNRNP25
SNRPD3
SOX2
SP5
SPOPL
SPRY1
SRM
SRSF6
SRSF7
SSBP1
ST6GAL1
STC2
SUGT1
SUPT16H
SURF2
SURF6
SYBU
SYNCRIP
SYT4
TARS
TCIRG1
TDGF1
TEAD2
TEAD4
TFE3
TGFB1
THBS2
TLE4
TMEM132D
TMEM68
TMEM9B
TMF1
TNFRSF8
TNPO3
TOMM40
TP53
TRA2B
TRIM39
TRIM65
TRMT112
TSPAN14
TSPAN33
TSR1
TUBB2B
TXNDC17
UBE2S
UBLCP1
UNG
UROD
USP2
UTP14A
UTP20
UTP23
VPS13B
VPS37A
WDR3
WDR33
WDR35
WDR74
WDR75
WNT5A
WNT5B
XPO1
XYLT1
YWHAG
ZBTB44
ZFP36L1
ZKSCAN5
ZNF18
ZNF180
ZNF239
ZNF3
ZNF510
ZNF551
ZNF552
ZNF643
ZNF655
ZNF665
ZNF691
ZWILCH

## Sheet: Table S6
Human orthologs of the genes in the core module and the genes in the MYC-centered module in ES cells (Kim, Woo et al. 2010)
Core_Human	Myc_Human
AGTRAP	AAAS
ANP32A	AASDHPPT
ASXL1	ABCB8
C1orf103	ABCE1
CAMK2N1	ADH5
CASQ2	ADHFE1
CBX1	ADPGK
CBX7	ADSL
CD38	AGPAT5
CHD9	AHI1
COBL	AKT1S1
CRMP1	ALAD
DLL1	AMD1
DST	AMH
DYRK3	ANAPC10
EVX1	ANKRD10
FBXO15	ANP32B
FN1	ARFRP1
GJA1	ARMC8
GJB3	ARV1
GPA33	ATAD2
GPR1	ATAD3A
HOXB13	ATF4
IFITM2	ATF7
IFITM2	ATIC
IL6ST	ATP5C1
ITGA9	ATP5E
JAM2	ATP5G2
KIFC3	ATP6V1F
KLF2	ATPIF1
KLF9	AURKB
LEFTY2	B3GNT7
LRRC2	BCLAF1
MAP4K4	BIRC2
MLLT6	BIVM
MSH6	BLM
MYBL2	BRD8
MYCN	BRE
NANOG	CACYBP
NFKBIA	CANX
NODAL	CBX3
PHC1	CBX5
PIPOX	CCND1
PLSCR1	CCNI
POU5F1	CCT3
PPP1R15B	CCT4
RARG	CCT7
RBBP5	CCT8
RBM14	CDK4
REST	CDT1
RHOF	CETN3
RPS19	CFL1
SFRP1	CHCHD1
SLC20A1	CIRH1A
SOCS2	CLNS1A
SOCS3	CLPP
SOX13	CNIH4
SOX2	CNOT4
SPRY2	COG4
SULF2	COX5A
TBC1D13	COX8A
TBL1XR1	CRAT
TCEA3	CSDE1
TCF3	CSNK2A1
TDGF1	CSTF1
TMEM8	DARS
TPD52	DBR1
TRIB3	DBT
TRIM25	DDB1
UCK2	DDX17
UPP1	DDX31
ZFP36L1	DDX5
ZFP42	DDX54
ZIC2	DERL2
ZIC5	DHX9
	DLST
	DNAJB4
	DNAJC8
	DPH3
	DTL
	EBNA1BP2
	EEF1A1
	EEF1B2
	EEF2
	EIF2S2
	EIF4A2
	EIF5A
	ELK4
	ENO3
	EPRS
	ERH
	ESPL1
	EWSR1
	EXOSC1
	FCHSD2
	FN1
	FNBP4
	FUBP1
	G3BP1
	GARS
	GDF9
	GMFB
	GMPS
	GNAS
	GNB2L1
	GNPAT
	GTF2IRD2B
	GTF3C4
	HDLBP
	HELLS
	HMGA1
	HMMR
	HSD17B12
	HSPA14
	HSPD1
	HSPE1
	IARS
	IFRD1
	IKBKAP
	ILF3
	IMP4
	INCENP
	IPMK
	IPO7
	JMJD6
	JUNB
	KBTBD3
	KCNK5
	KCTD9
	KDELC1
	KIF20A
	KIFC1
	KIN
	KLF16
	LAPTM4A
	LDHA
	LMAN2
	LMLN
	LNPEP
	LRRC40
	LRSAM1
	LSM2
	LUC7L
	MAF1
	MAN1B1
	MAP3K12
	MARS
	MAT2B
	MCM4
	MCM5
	MCM6
	MIS12
	MMAA
	MMP14
	MRP63
	MRPL12
	MRPL17
	MRPL18
	MRPL36
	MRPL49
	MRPL50
	MRPS12
	MRPS28
	MRPS30
	MSH4
	MTHFD1
	MTHFD1L
	MUS81
	MUTYH
	MYO1G
	NACA
	NCL
	NDOR1
	NDUFA13
	NDUFS1
	NDUFS6
	NEK8
	NFE2L1
	NFKBIL1
	NFYC
	NMD3
	NME1
	NOLC1
	NPM1
	NT5C3
	NUP50
	NUTF2
	NVL
	OSGEP
	PAICS
	PASK
	PCBP1
	PFN1
	PIGW
	PLA2G6
	PLEKHJ1
	PLK4
	PLOD3
	PMF1
	PNN
	PNPLA2
	POLH
	POLR3B
	POP7
	PPAN
	PPCS
	PPID
	PPP1R15B
	PPP1R7
	PPP2R4
	PRDX1
	PRKAB1
	PRKDC
	PRPF19
	PRPF38B
	PSAT1
	PSME3
	PTBP1
	QTRTD1
	RAB25
	RAB34
	RAD1
	RAD50
	RAF1
	RANBP1
	RANBP2
	RBKS
	RCC1
	RDH10
	RGS14
	RLBP1
	RNF4
	RNF41
	RNMT
	RPL14
	RPL18
	RPL23
	RPL23A
	RPL28
	RPL3
	RPL32
	RPL35A
	RPL37
	RPL7
	RPLP1
	RPLP2
	RPS11
	RPS12
	RPS13
	RPS14
	RPS19
	RPS24
	RPS25
	RPS27A
	RPS27L
	RPS3
	RRM2
	RRS1
	S100A13
	SAMD10
	SARS2
	SCAMP4
	SEH1L
	SESN2
	SF3A1
	SF3A2
	SF3B3
	SGOL2
	SLBP
	SLC16A1
	SLC25A10
	SLC33A1
	SLC3A2
	SLC5A5
	SLC6A9
	SLC7A6
	SLC9A8
	SMARCAD1
	SNRPA
	SNRPA1
	SNRPE
	SNX5
	SOD1
	SOS1
	SP1
	SPHK2
	SS18
	ST13
	STC2
	STX12
	SUMF1
	SUPV3L1
	SUZ12
	TACC3
	TAF12
	TAF15
	TARBP2
	TBC1D17
	TBRG4
	TCEA1
	TCP1
	THRAP3
	TIAL1
	TIMM9
	TM9SF4
	TNFAIP1
	TNPO3
	TOE1
	TOMM20
	TOPORS
	TRAPPC4
	TRAPPC6B
	TRIM8
	TRIP13
	TRNT1
	TUBA3C
	UBE2I
	UBQLN4
	UNG
	VPS16
	WBSCR16
	WDR34
	WEE1
	XPO5
	XRN2
	ZBTB37
	ZCCHC7
	ZDHHC16
	ZFP36L2
	ZGPAT
	ZMYND12
	ZNHIT1
	ZNHIT2
	PLIN3
	HNRNPR
	NOP56
	TRMT2A
	LAMTOR2
	HNRNPA1
	HNRNPA2B1
	HNRNPH1
	HNRNPM
	NOP2
	GAR1
	BRIX1
	PIDD
	NSUN5
	SRSF1
	AEN
	MANF
	DCAF11
	RTCA
	EIF3A
	EIF3B
	TRMT10A
	IP6K1

## Sheet: Table S7
Top 5 pathways associated with both modules
Core Module	MYC Module
Role of Oct4 in Mammalian Embryonic Stem Cell Pluripotency	EIF2 Signaling
Human Embryonic Stem Cell Pluripotency	Regulation of eIF4 and p70S6K Signaling
Mouse Embryonic Stem Cell Pluripotency	mTOR Signaling
Wnt/β-catenin Signaling	Cell Cycle Control of Chromosomal Replication
Embryonic Stem Cell Differentiation into Cardiac Lineages	Telomere Extension by Telomerase
