# Supplementary material for: Computational Analysis of Transcriptional Circuitries in Human Embryonic Stem Cells Reveals Multiple and Independent Networks
Source: Biomed Res Int. 2014 Jan 9;2014:725780. doi: 10.1155/2014/725780 (PMC3910540; doi:10.1155/2014/725780)
Supplement: Supplementary file 2 [file 725780.f2.zip]

Archive with 9 entries (8 files):
- supplementary figures_material_checker_2013-12-03_725780_/
- supplementary figures_material_checker_2013-12-03_725780_/Figure S1.pdf
- supplementary figures_material_checker_2013-12-03_725780_/Figure S2.pdf
- supplementary figures_material_checker_2013-12-03_725780_/Figure S3.pdf
- supplementary figures_material_checker_2013-12-03_725780_/Figure S4.pdf
- supplementary figures_material_checker_2013-12-03_725780_/Figure S5.pdf
- supplementary figures_material_checker_2013-12-03_725780_/Figure S6.pdf
- supplementary figures_material_checker_2013-12-03_725780_/Figure S7.pdf
- supplementary figures_material_checker_2013-12-03_725780_/Figure S8.pdf
